# Supplementary material
Source: Springer Nature journal article supplement (https://www.springermedizin.de/resource/supplementary/13014_2012_829_MOESM4_ESM.pdf/9634800)

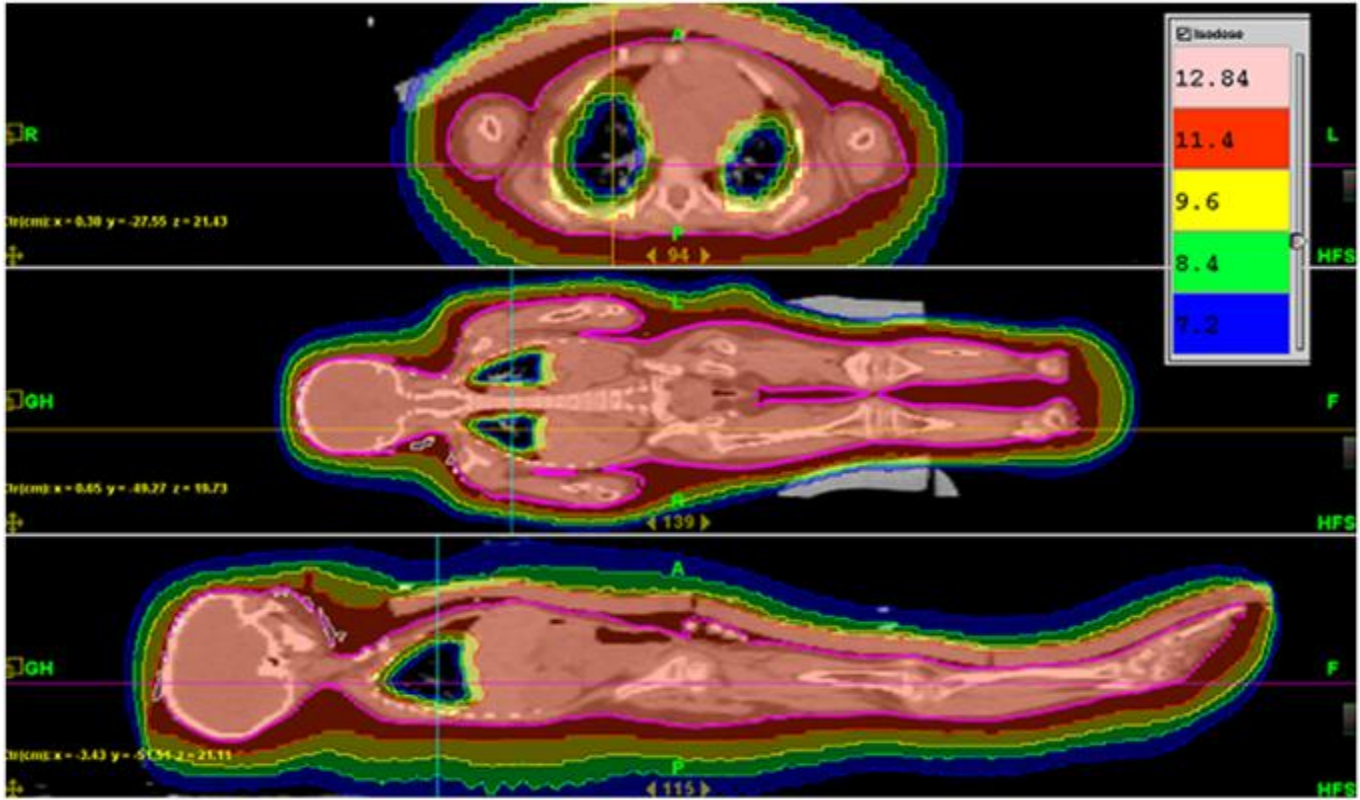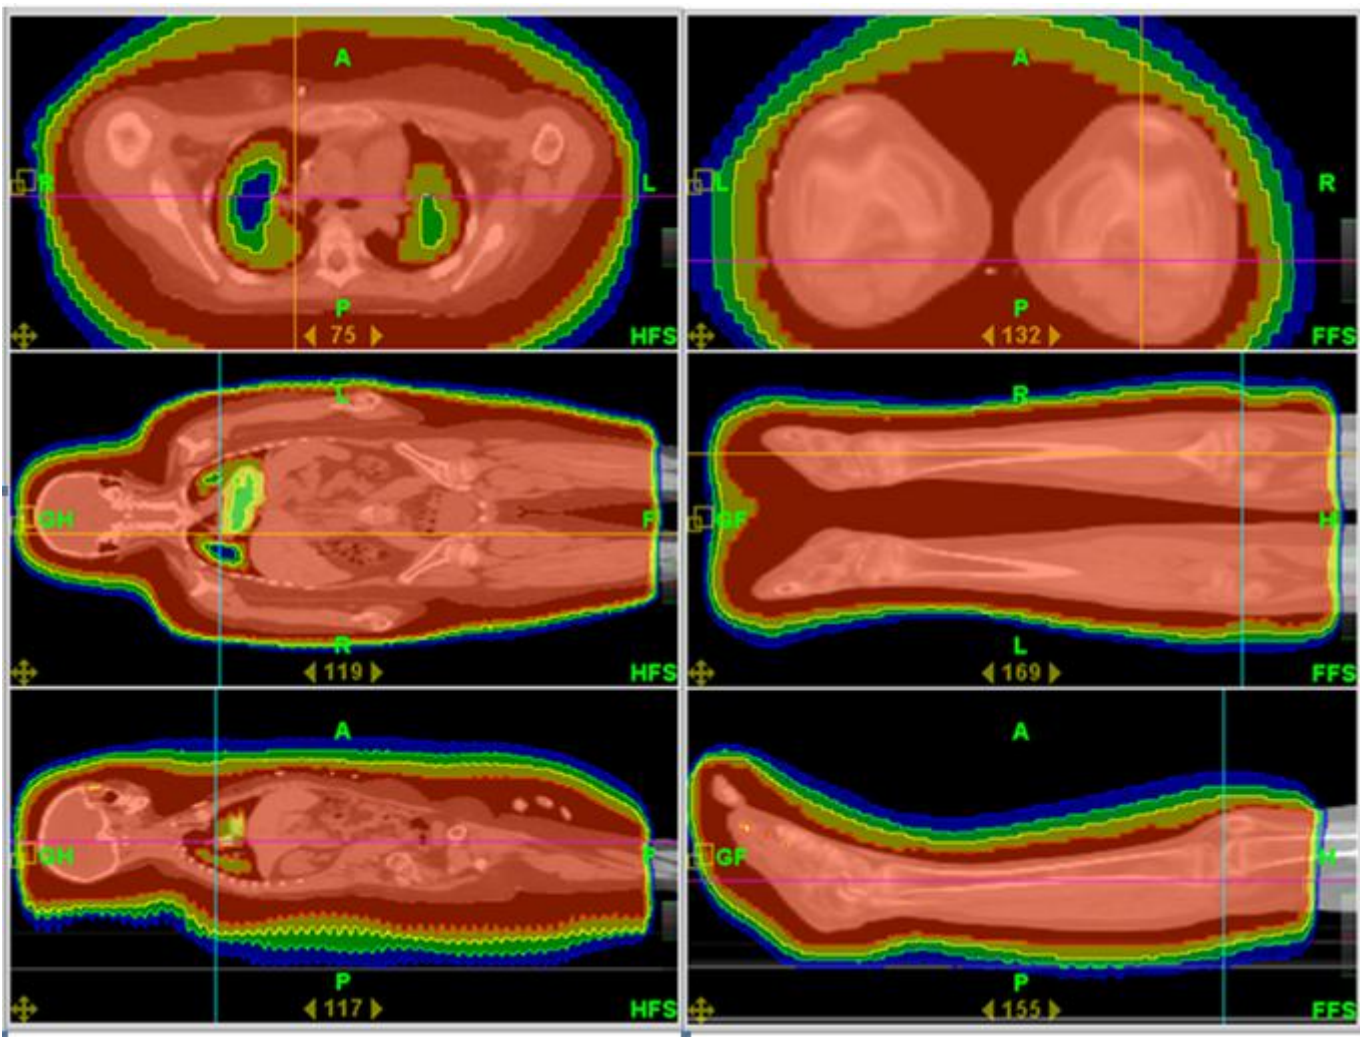

Supplement: MOESM4 [file 9634800]
